# Supplementary material for: Decoupling of CVD-grown epitaxial graphene using NaCl intercalation
Source: Royal Society of Chemistry journal article supplement (doi:10.1039/d2nr05660g), 2022-01-01
Supplement: d2nr05660g1.pdf [file d2nr05660g1.pdf]

**Supplementary Information for  
Decoupling of CVD-grown epitaxial graphene using NaCl intercalation**

Yohan Kim<sup>a</sup>, Huijun Han<sup>a</sup>, Da Luo<sup>b</sup>, Rodney S. Ruoff<sup>fbcad</sup> and Hyung-Joon Shin<sup>\*ab</sup>

<sup>a</sup>Department of Materials Science and Engineering, Ulsan National Institute of Science and Technology (UNIST), Ulsan 44919, Republic of Korea.

<sup>b</sup>Center for Multidimensional Carbon Materials (CMCM), Institute for Basic Science (IBS), Ulsan 44919, Republic of Korea.

<sup>c</sup>Department of Chemistry, Ulsan National Institute of Science and Technology (UNIST), Ulsan 44919, Republic of Korea.

<sup>d</sup>School of Energy and Chemical Engineering, Ulsan National Institute of Science and Technology (UNIST), Ulsan 44919, Republic of Korea.

\*Corresponding author: [shinhj@unist.ac.kr](mailto:shinhj@unist.ac.kr)

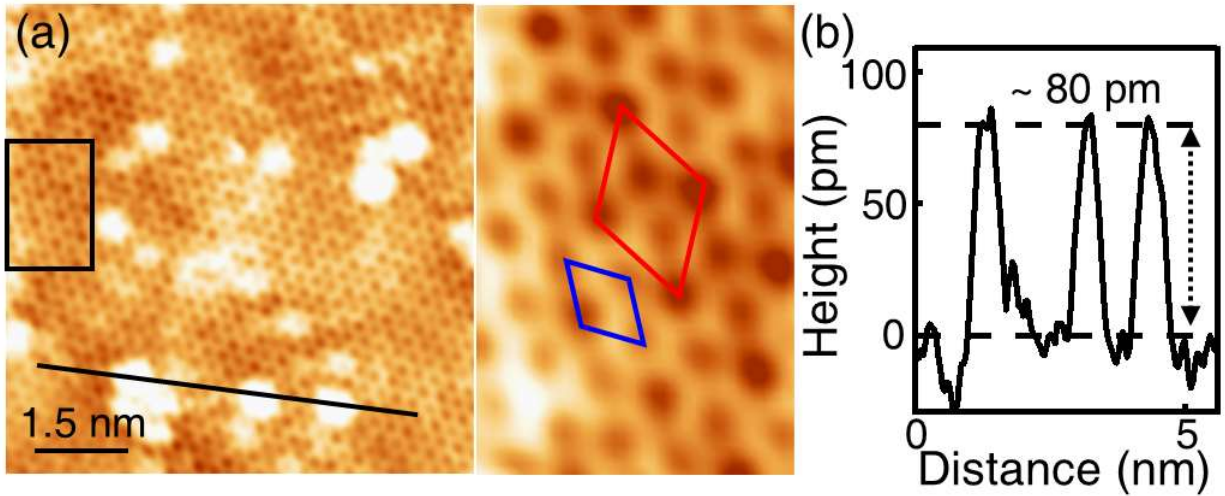

**Fig. S1.** (a) Scanning tunnelling microscopy (STM) images of the single-layer graphene (SLG) on Cu(111) ( $V_s = 50$  mV,  $I_t = 700$  pA). A magnified topography (right) indicated by the black rectangle in the left image. Red and blue diamonds represent the graphene lattice and **R3** supercell, respectively. (b) Height profile along the line marked in (a) represents the height of (bright) Cu vacancies.

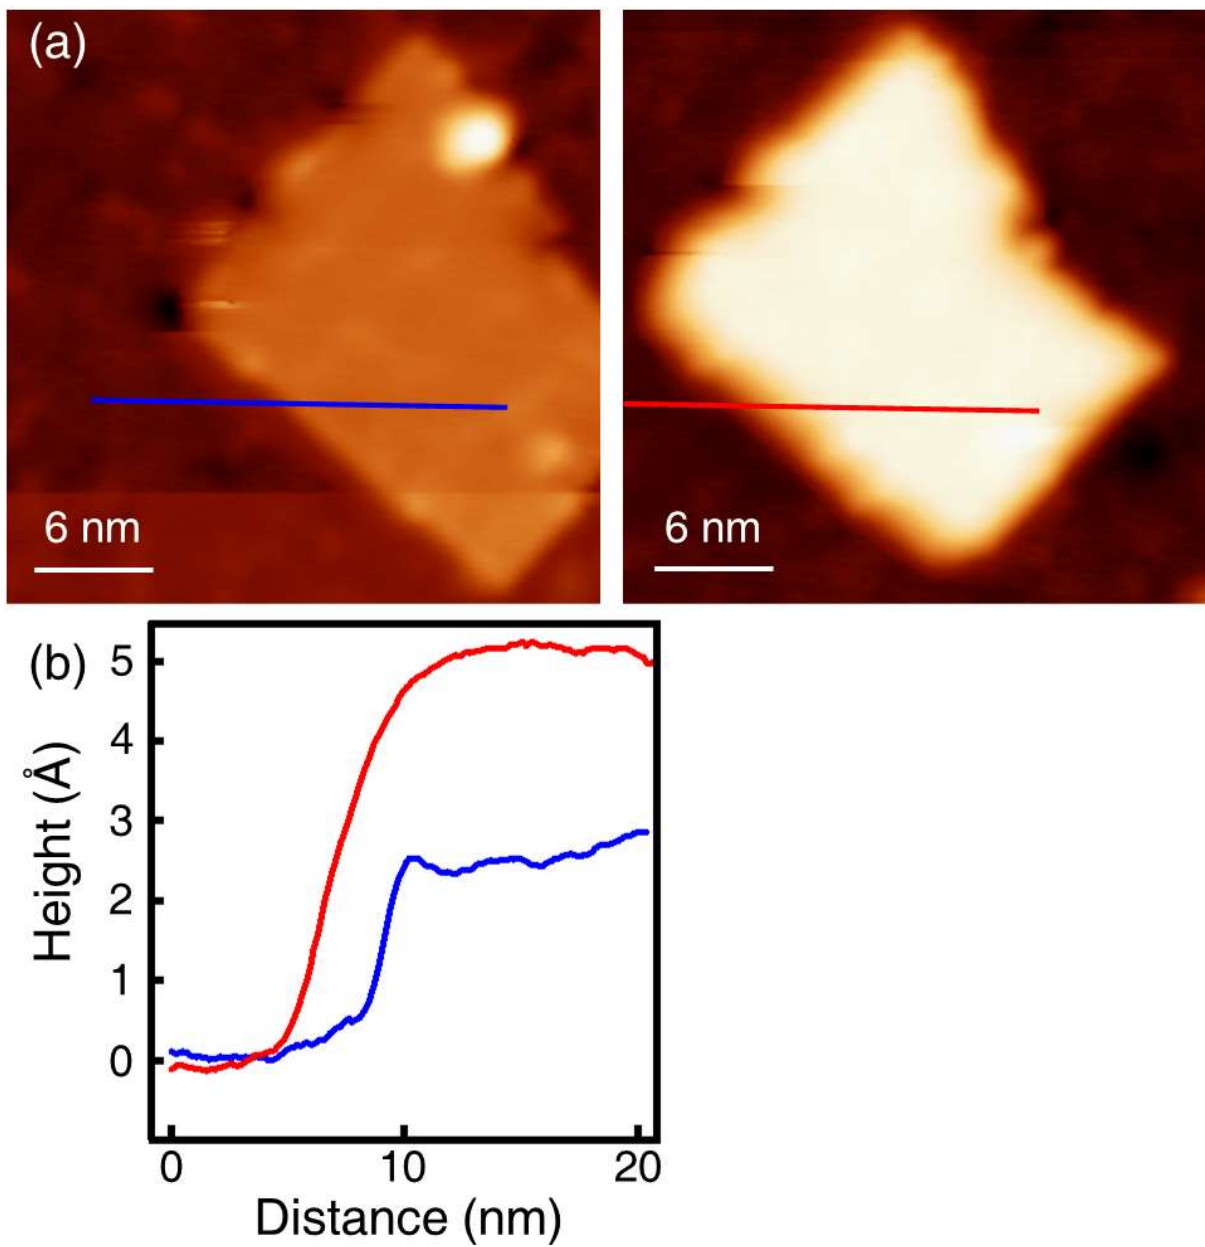

**Fig. S2.** (a) STM images of 2 ML NaCl grown on SLG/Cu imaged at the sample bias of 3.0 (left) and 4.0 V (right) ( $I_t = 50$  pA). (b) Height profiles along the blue and red lines in (a).

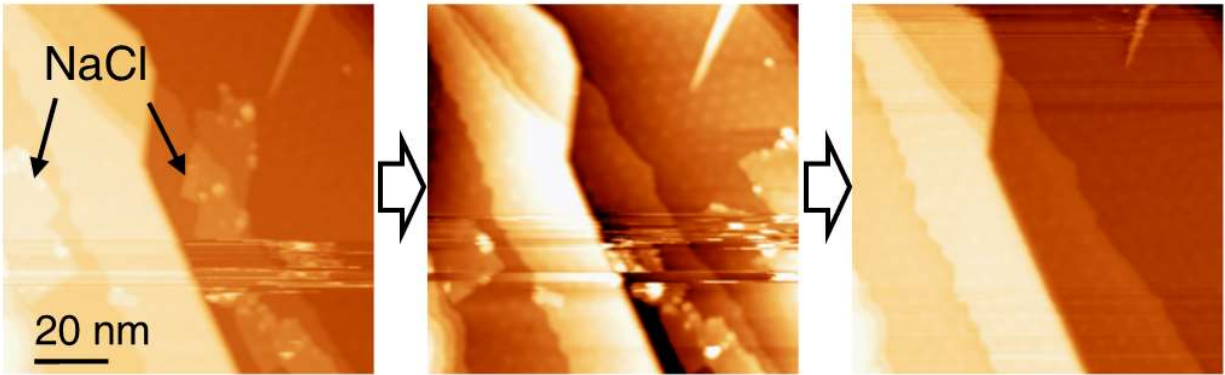

**Fig. S3.** Sequential STM images ( $V_s = 2.0$  V,  $I_t = 50$  pA) exhibiting (001)-oriented NaCl islands that were moved and cracked by the STM tip.

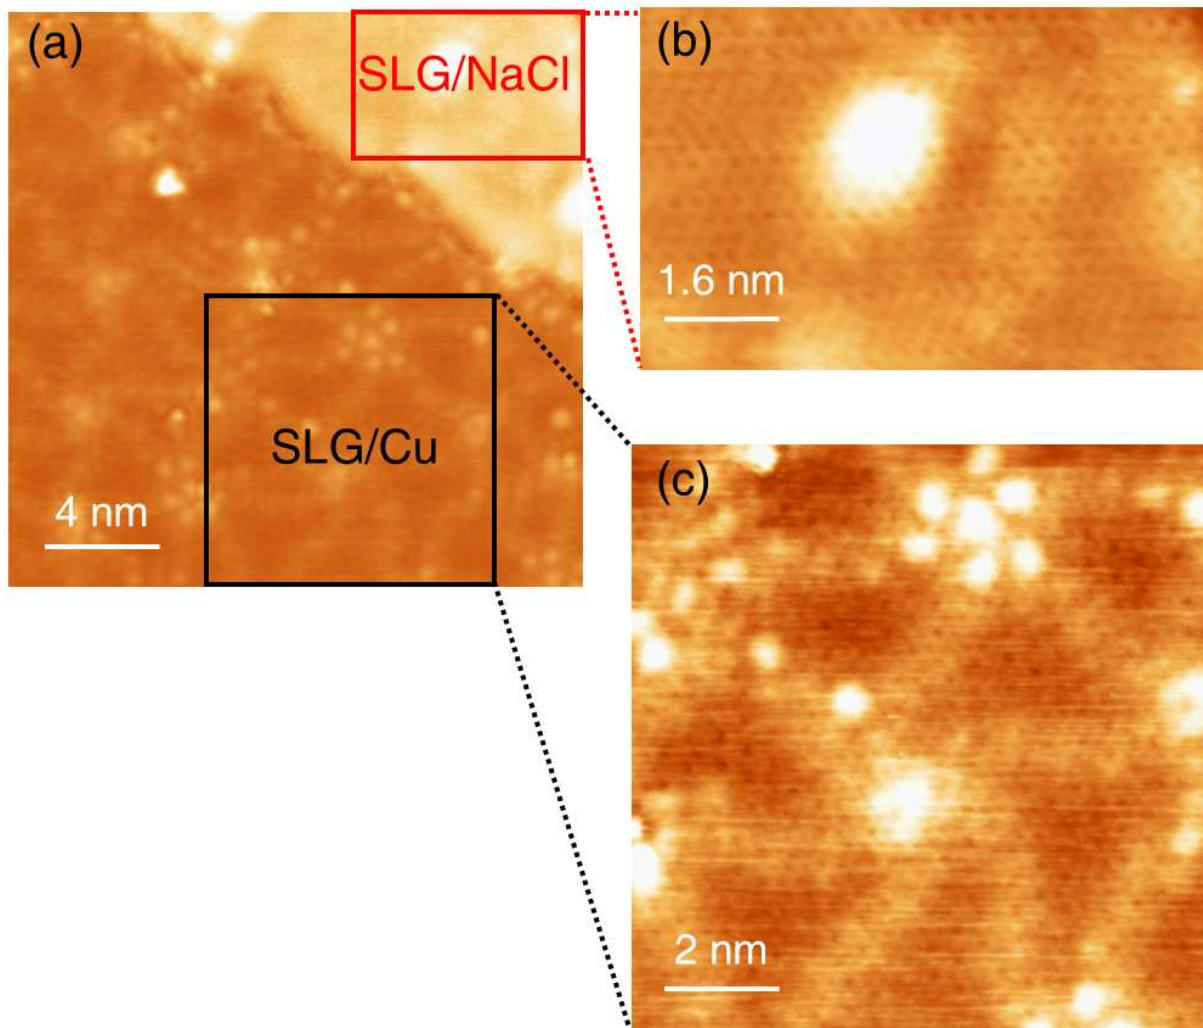

**Fig. S4.** (a) STM image of NaCl-intercalated graphene and SLG/Cu ( $V_s = -0.5$  V,  $I_t = 500$  pA). Zoomed-in topographies of (b) SLG/NaCl ( $V_s = -0.5$  V,  $I_t = 500$  pA) and (c) SLG/Cu ( $V_s = 0.4$  V,  $I_t = 500$  pA) indicated by the red and black rectangle in (a), respectively.

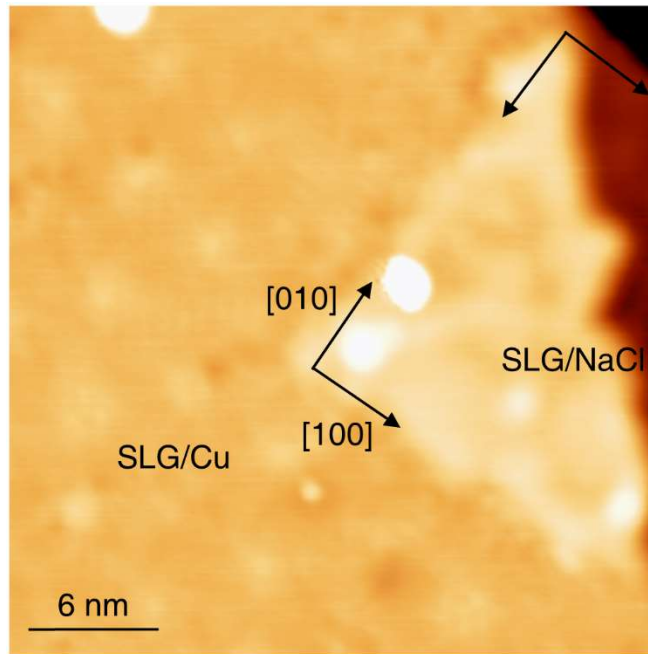

**Fig. S5.** STM image of an intercalated  $\langle 100 \rangle$ -oriented NaCl island ( $V_s = 2.0$  V,  $I_t = 50$  pA).

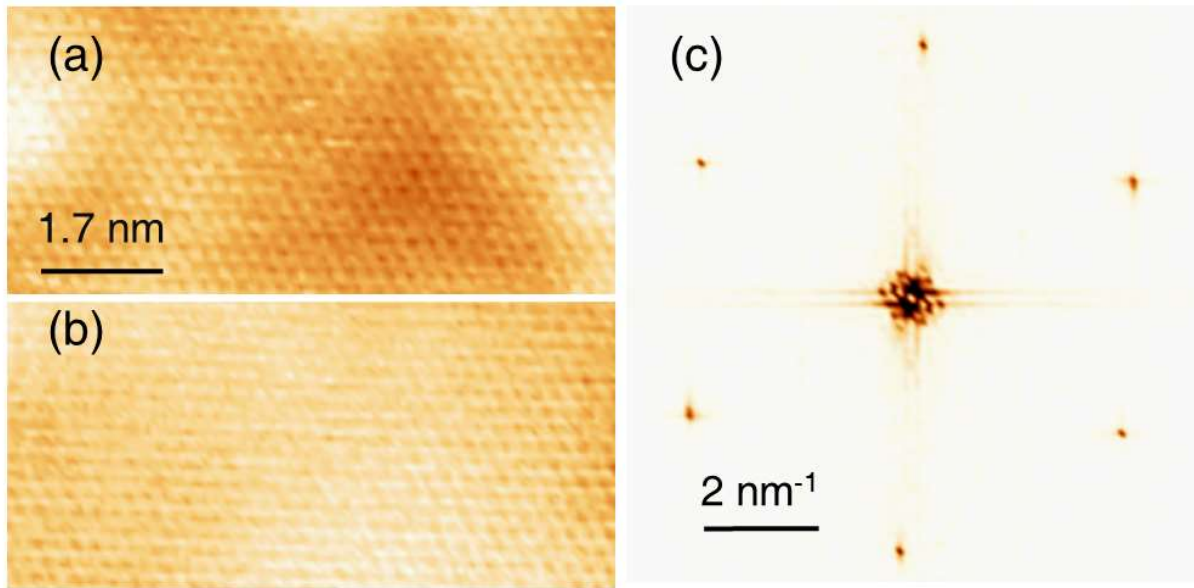

**Fig. S6.** (a) Atommally-resolved STM topography of NaCl-intercalated graphene representing the graphene lattice ( $V_s = 0.4$  V,  $I_t = 500$  pA). (b) Simultaneously acquired  $dI/dV$  map. (c) FT of the STM image (a) revealing a honeycomb lattice without Kekulé distortion.

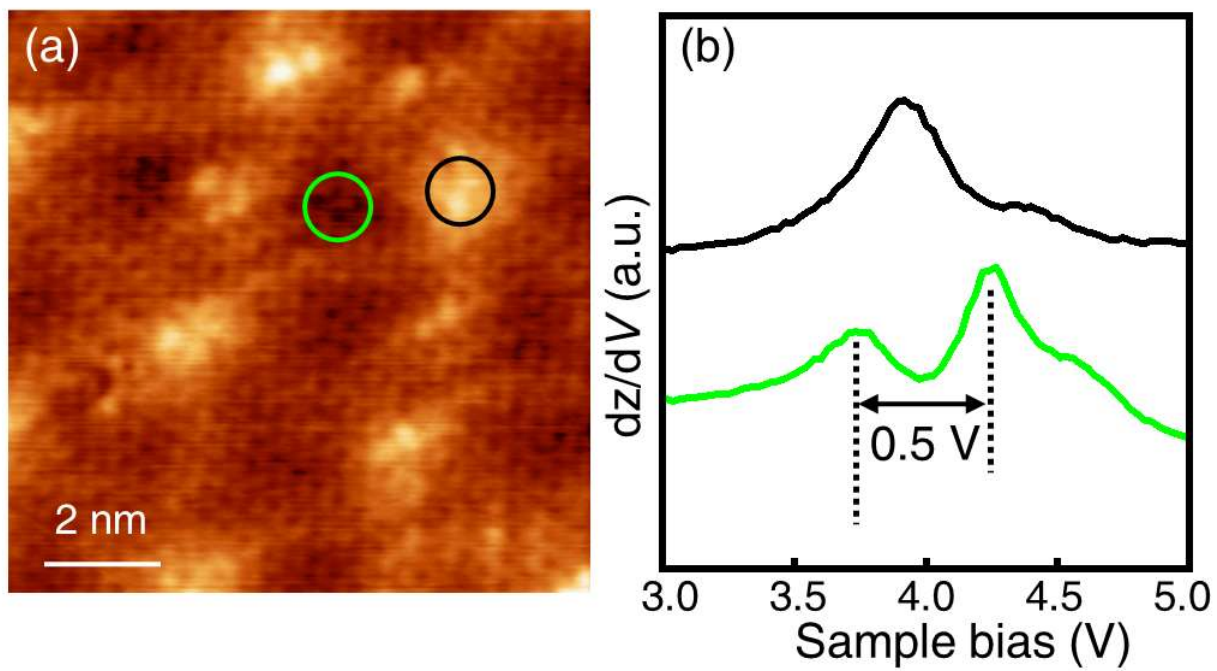

**Fig. S7.** (a) STM topography showing the honeycomb lattice and bright Cu vacancies ( $V_s = 0.1$  V,  $I_t = 500$  pA). (b) FER spectra obtained from Cu vacancy (black) and from SLG near the Cu vacancy showing the peak splitting (green).
